# Supplementary material for: Utilizing Gene Tree Variation to Identify Candidate Effector Genes in Zymoseptoria tritici
Source: PubMed Central journal article supplement (PMC4825649; doi:10.1534/g3.115.025197), 2016-01-29
Supplement: supp_g3.115.025197_FigureS2.pdf [file supp_g3.115.025197_FigureS2.pdf]

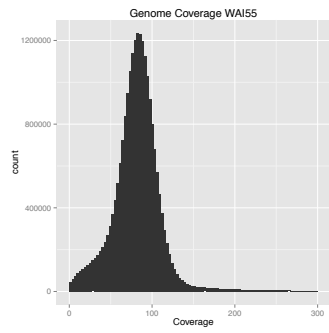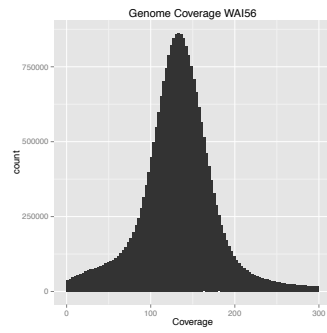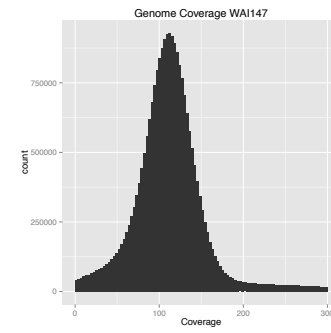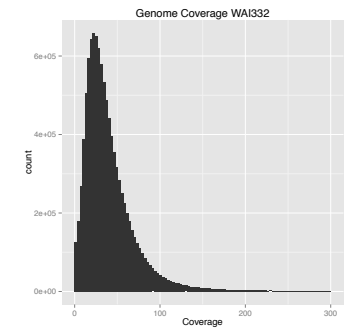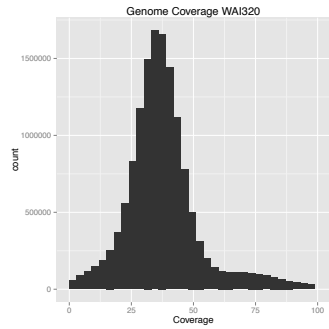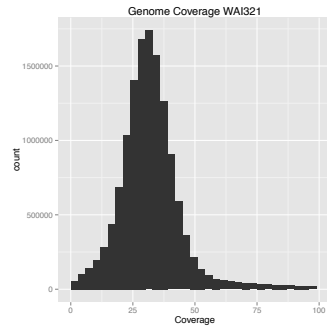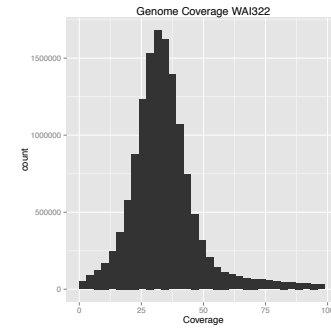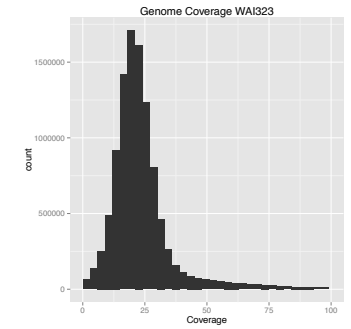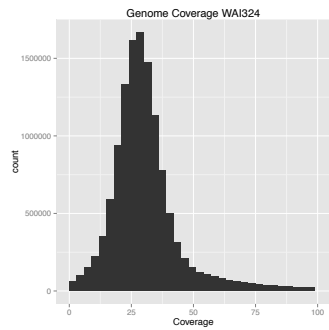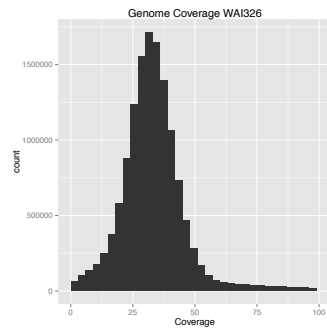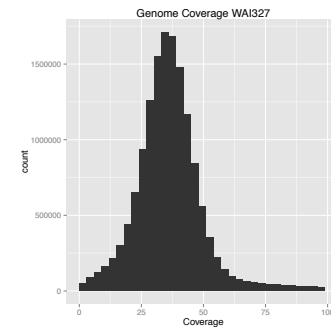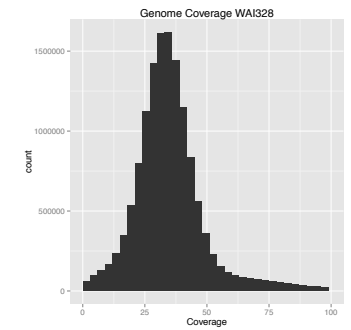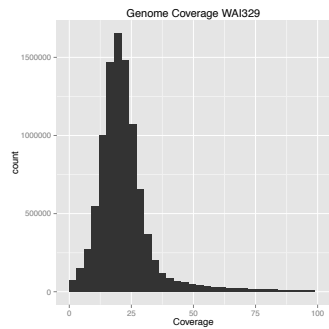

Histograms generated from the bedgraph files of each isolate aligned to the reference genome IPO323. Bedgraph files were created with `bedtools genomeCoverageBed -bga -ibam isolate.realign.bam -g Ztritici_bedtools.genome`. Bam files are the final bam files used for SNP calling in GATK. The histogram plots x-axis is limited to 100 for WAI320-329 and to 300 for WAI332, WAI147, WAI55-56.
