# Supplementary material for: Utilizing Gene Tree Variation to Identify Candidate Effector Genes in Zymoseptoria tritici
Source: PubMed Central journal article supplement (PMC4825649; doi:10.1534/g3.115.025197), 2016-01-29

Figure S3: Dendrogram constructed with the whole genome phylogenetic program *andi*. Dendrogram was plotted using the distance matrix generated by *andi*. Input for *andi* was the entire de novo assembly of each fungal isolate. The topology matches the one constructed using the concatenated gene alignment with BEAST.

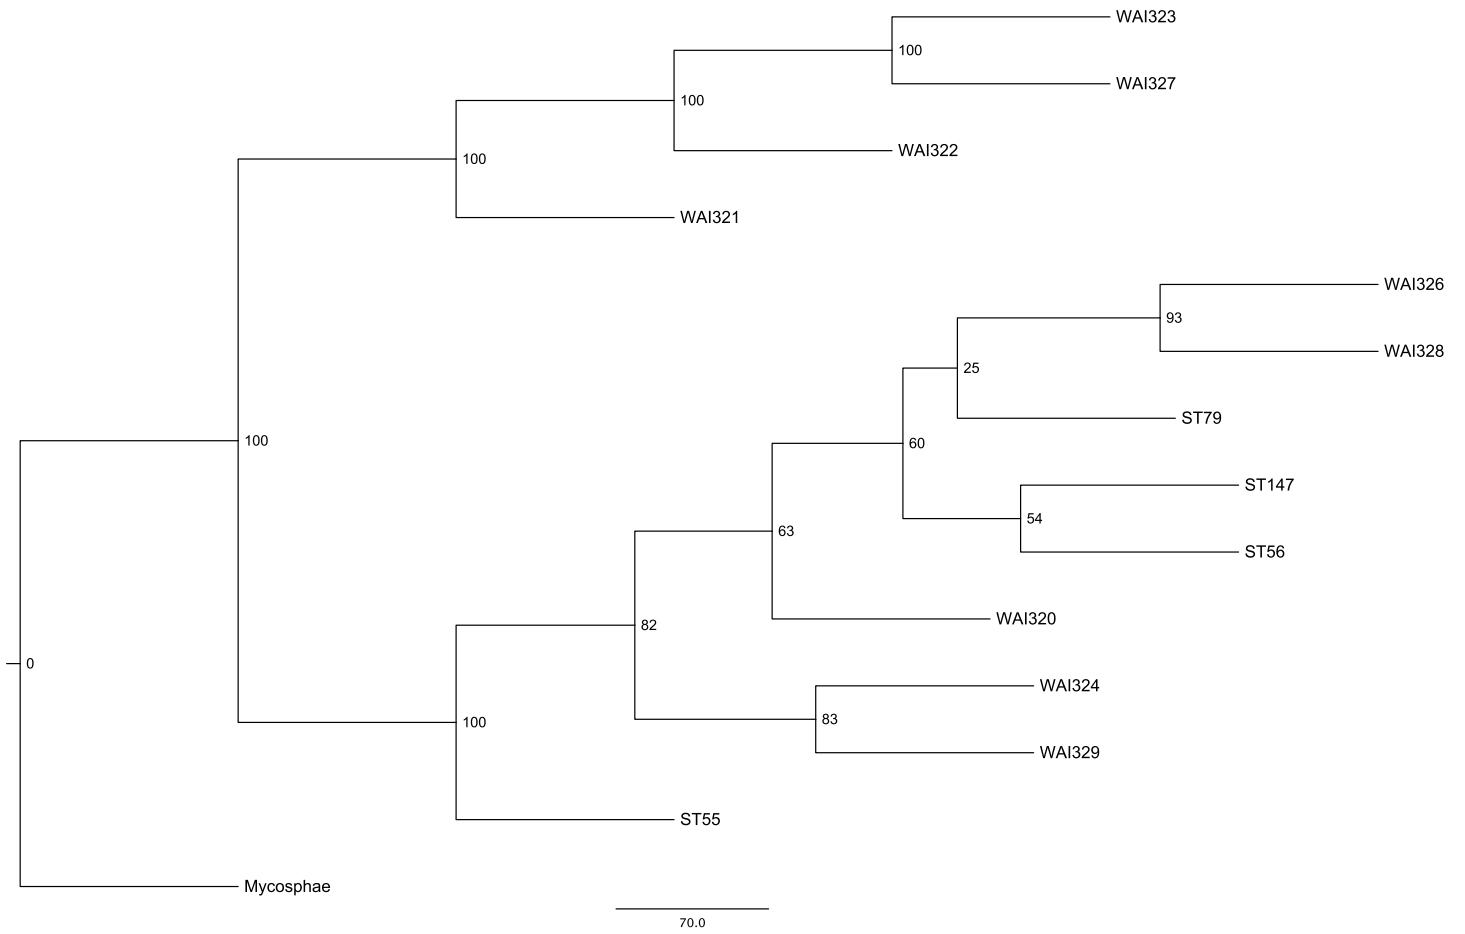

Supplement: supp_g3.115.025197_FigureS3.pdf [file supp_g3.115.025197_FigureS3.pdf]
