# Supplementary material for: Utilizing Gene Tree Variation to Identify Candidate Effector Genes in Zymoseptoria tritici
Source: PubMed Central journal article supplement (PMC4825649; doi:10.1534/g3.115.025197), 2016-01-29

Figure\_S4: K-means clustering of virulence data. The top plot shows the kmeans centers (purple dots) surrounded by the isolates who are grouped with that center. Three kmeans clusters were chosen a priori based on the curved line shown in the lower graph.

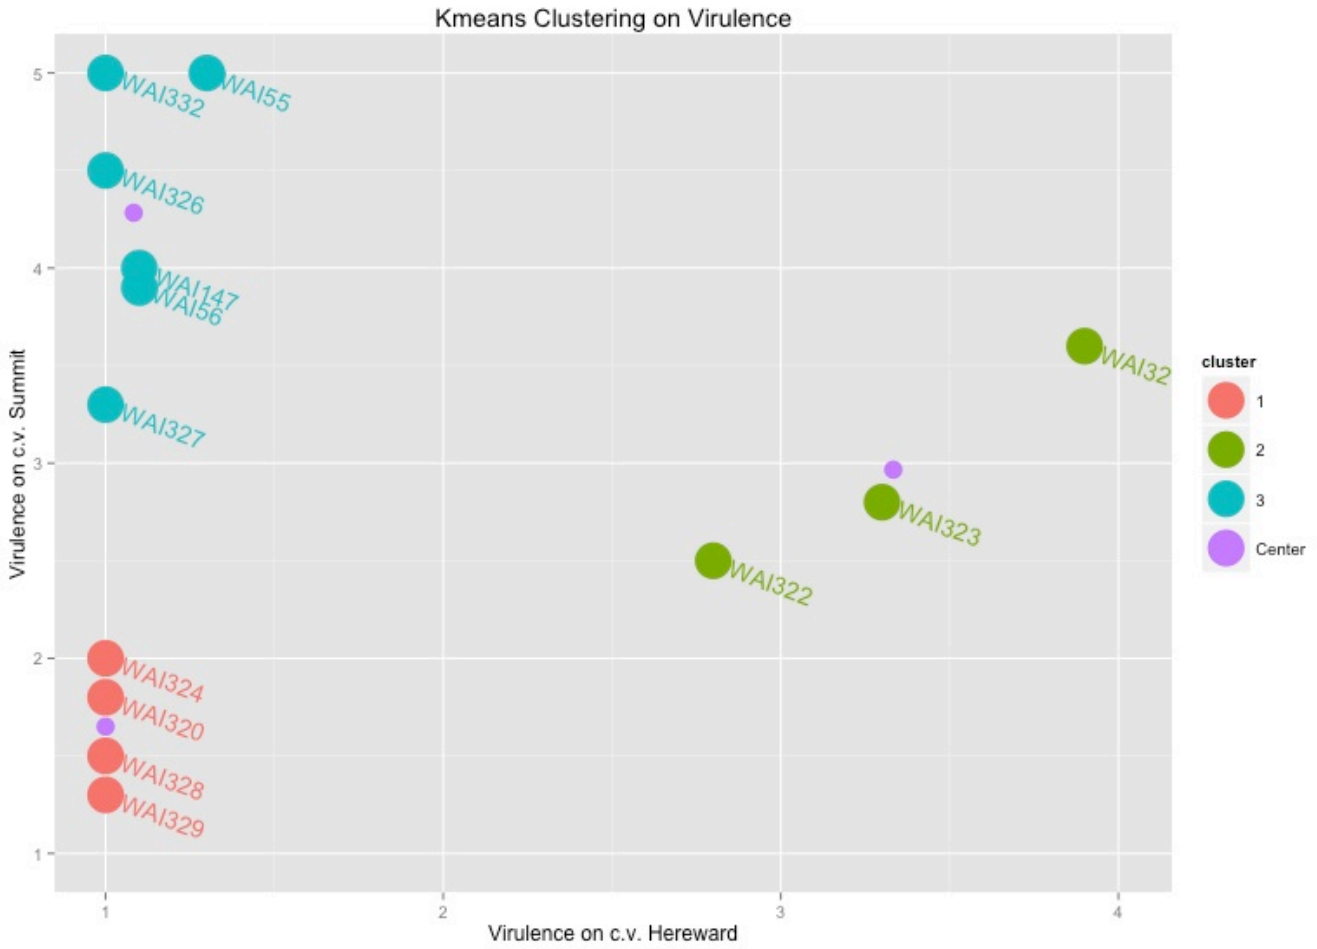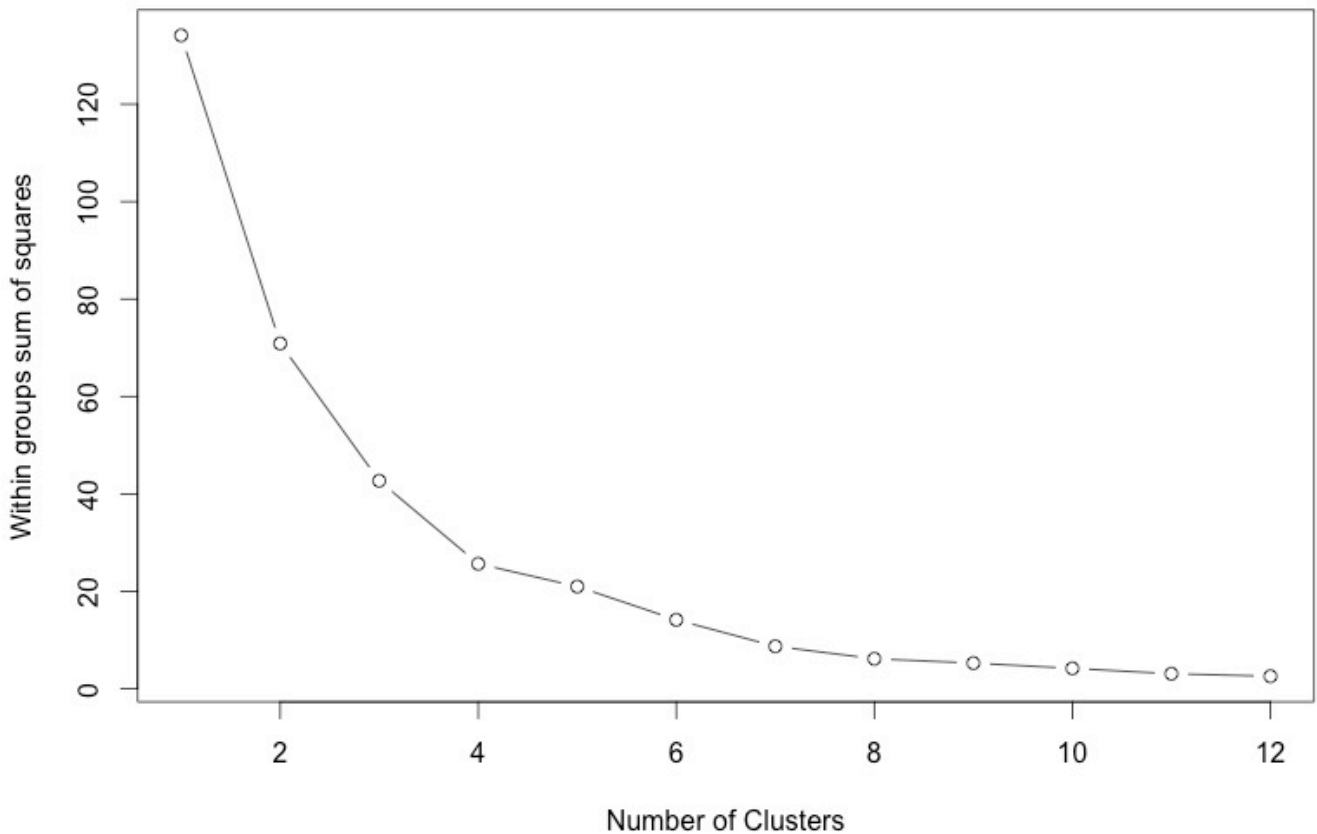

Supplement: supp_g3.115.025197_FigureS4.pdf [file supp_g3.115.025197_FigureS4.pdf]
